# Supplementary material for: Associations between Community Built Environments with Early Care and Education Classroom Physical Activity Practices and Barriers
Source: Int J Environ Res Public Health. 2021 Jun 17;18(12):6524. doi: 10.3390/ijerph18126524 (PMC8296338; doi:10.3390/ijerph18126524)
Supplement: Supplementary file 1 [file ijerph-18-06524-s001.zip › ijerph-1241569-supplementary.pdf]

Dear ECE center/home director,

We are conducting a research study seeking to better understand how Early Childhood Education (ECE) centers' surrounding community environment may influence classroom health practices and/or experiences of the childcare staff. Results from this study will provide valuable information to support center-specific intervention and implementation of tailored resources to provide support for teachers who have difficulty implementing health-based curriculum. We are requesting your participation as a center director of a licensed ECE center that **includes children ages 3 to 5 years old**. For this study, a **"center"** may be a **Head Start center, community-based childcare center, or family childcare home**.

This survey contains questions about your ECE center's location and demographics; nutrition, physical activity and other health-related practices; and barriers experienced when attempting to implement classroom health practices. We estimate that it will take about 25 minutes to complete the survey. If you complete the survey, you will be given the opportunity to enter into a drawing for one of forty-five \$25 Amazon gift cards.

Your participation in this study is voluntary. If you choose not to participate or choose to participate but then withdraw from this study, there will be no penalty to you. You can stop the survey at any time. The attached survey will be confidential.

If you have any questions concerning this research study, please email the Principal Investigator, Dr. Susan Sisson, at [susan-sisson@ouhsc.edu](mailto:susan-sisson@ouhsc.edu) (405-271-2113 x 41176) or contact the Study Coordinator, Bethany Williams, at [Bethany-Williams@ouhsc.edu](mailto:Bethany-Williams@ouhsc.edu) (405-271-2113 x 41173).

---

## COMMUNITIES AND CLASSROOM HEALTH SURVEY

**INSTRUCTIONS:** We ask the survey be filled out by **one** director or provider most familiar with the ECE's nutrition, physical activity and other health-related practices. However, you may come across questions that you think someone else in your ECE could answer more easily than you. If so, **please feel free to ask your staff for help**.

- These questions ask about health practices in your **preschool-age classroom(s) (3-5 year old) or Head Start program**. Please answer questions only about your preschool classroom with children ages 3-5 years. Unless otherwise specified, please do NOT include information about your infant classroom or your Early Head Start program (if you have one).
- When we refer to teachers, we mean individuals who have direct contact with preschoolers (3-5 years) and are responsible for supervising meals or snacks for preschool children.
- Please answer about what is currently happening in your ECE, unless a question asks about another time period.
- We do not expect you or your staff will have to consult any administrative records in order to complete the survey.
- If you are unsure about how to answer a question, please give the best answer you can rather than leaving it blank.

For your convenience, you may either complete and mail back the surveys contained in this packet using the postage-paid envelope provided, OR you may instead complete the surveys online. **PLEASE USE THE FOLLOWING LINK IF YOU WOULD LIKE TO COMPLETE THE SURVEYS ONLINE:** [https://is.gd/OKcommunities\\_classrooms](https://is.gd/OKcommunities_classrooms)

---

First, to determine ECE access to healthful community resources (healthful food outlets, parks, playgrounds, etc.) we will need the **name and physical location (address)** of your ECE center. This information will remain confidential, and findings will only be discussed in combination with data from other ECEs.

\_\_\_\_\_  
\_\_\_\_\_

### ABOUT YOUR CENTER

1. Which of the following best describes your center?

|                         | YES                   | NO                    |
|-------------------------|-----------------------|-----------------------|
| Center based child care | <input type="radio"/> | <input type="radio"/> |
| Family childcare home   | <input type="radio"/> | <input type="radio"/> |
| Head Start              | <input type="radio"/> | <input type="radio"/> |
| Public pre-k program    | <input type="radio"/> | <input type="radio"/> |
| Other (please specify): | <input type="radio"/> | <input type="radio"/> |

\_\_\_\_\_

2. Which of the following best describes your center (select all that apply)?

- ☐ Half-day  
☐ Full-day  
☐ Other (please specify):

\_\_\_\_\_

3. Is your center NAEYC accredited?

- ☐ Yes  
☐ No  
☐ Not sure

4. Is your center tribally-affiliated?

- ☐ Yes  
☐ No  
☐ Not sure

5. Is your center fully enrolled at this time?

- ☐ Yes  
☐ No  
☐ Not sure

**If you answered "No",** what do you think is the major reason?

\_\_\_\_\_

6. Do 3-5 year old children often leave your center to enroll in other programs (public pre-K, other preschools, etc.)?

- ☐ Yes  
☐ No  
☐ Not sure

**If you answered "Yes",** what do you think is the major reason?

\_\_\_\_\_

7. What is the number of teachers employed at your center who serve 3-5 year old children?

\_\_\_\_\_

8. Of the teachers employed at your center who serve 3-5 year old children, what estimated percentage have a Bachelor's degree or higher?

\_\_\_\_\_

9. What is the number of additional supporting staff employed at your center (assistant teachers, aids, substitutes, etc.) who serve 3-5 year old children?

\_\_\_\_\_

10. What is the number of classrooms in your center **total**?

\_\_\_\_\_

11. What is the number of classrooms in your center **with children who are 3-5 years old**?

\_\_\_\_\_

12. What is the number of children in your center **total**?

\_\_\_\_\_

13. What is the number of children in your center **who are 3-5 years old**?

\_\_\_\_\_

14. On a typical day, what estimated percentage of 3-5 year old children in your center are Hispanic or Latino?

\_\_\_\_\_

15. On a typical day, what **estimated percentage** of 3-5 year old children in your center are of the following racial backgrounds?

\_\_\_\_\_ American Indian or Alaska Native

\_\_\_\_\_ Asian

\_\_\_\_\_ Black or African American

\_\_\_\_\_ Native Hawaiian or Pacific Islander

\_\_\_\_\_ White or Caucasian

\_\_\_\_\_ Mixed race

\_\_\_\_\_ Other (*please specify*):

16. To your knowledge, what **estimated percentage** of 3-5 year old children in your center:

...participate in the Supplemental Nutrition Assistance Program (SNAP)?

\_\_\_\_\_

...participate in the Special Supplemental Nutrition Program for Women, Infants, and Children (WIC)?

\_\_\_\_\_

...struggle with hunger?

\_\_\_\_\_

...lack access to healthy foods at home?

\_\_\_\_\_

20. Are the food and beverages for your center's meal service prepared on site?

- ☐ Yes  
☐ No  
☐ Both yes and no (*please explain*):

\_\_\_\_\_

21. How are the food and beverages for your center's meal service primarily obtained?

- ☐ In-person shopping at a store  
☐ Online ordered then picked up in-person  
☐ Online and delivered  
☐ Over the phone with a vendor

***If you answered "In person shopping at store", or "Online ordered then picked up in-person", approximately how many miles to and from (roundtrip) does the center's food purchaser travel to get to the location where the center's foods and beverages are primarily obtained?***

\_\_\_\_\_

22. Who is responsible for planning meals for 3-5 year old children (*select all that apply*)?

- ☐ Owner of ECE  
☐ Director or site supervisor/manager  
☐ Family childcare provider  
☐ Cook or chef  
☐ Catering company  
☐ Dietician  
☐ Parents/guardians provide food for their children  
☐ Other (*please specify*):

\_\_\_\_\_

23. In which of the following does your center participate (*select all that apply*)?

- ☐ Child and Adult Care Food Program (CACFP) by USDA, which provides reimbursement for foods served  
☐ Nutrition and Physical Activity Self-Assessment for Child Care (Go NAP SACC)  
☐ Healthy Body, Healthy Minds  
☐ Happy Healthy Homes  
☐ Certified Early Childhood

24. How often does your center participate in out-of-center activities within the community (*for example, visiting public parks, eating at restaurants, nearby field trips, etc.*)?

- ☐ Very often  
☐ Somewhat often  
☐ Not very often  
☐ Never

25. Please indicate which of the following are provided in your center for 3-5 year old children (*select all that apply*)?

- ☐ Breakfast
- ☐ Lunch
- ☐ Dinner
- ☐ Mid-morning snack
- ☐ Mid-afternoon snack
- ☐ Evening snack

26. Please indicate which of the following meals are provided by parents, and not by the center, for 3-5 year old children (*select all that apply*)?

- ☐ Breakfast
- ☐ Lunch
- ☐ Dinner
- ☐ Mid-morning snack
- ☐ Mid-afternoon snack
- ☐ Evening snack

27. Does your center currently have a health advisory committee? (*Note: a health advisory committee is a group of parents and/or community partners that meet to discuss ideas and programs to create healthier spaces for children at your center.*)

- ☐ Yes
- ☐ No
- ☐ Not sure

28. Does your center have a policy restricting outdoor play during certain temperatures (*for example, if it is less than 50 degrees outside*)?

- ☐ Yes: Oklahoma Child Care Licensing policy
- ☐ Yes: Policy in addition to Oklahoma Child Care Licensing
- ☐ No

**If you answered "Yes: Policy in addition to OK CC Licensing", please specify:**

---

#### CENTER ALLERGIES & ASTHMA

1. To your knowledge, what **estimated percentage** of 3-5 year old children in your center have asthma?

---

2. To your knowledge, what **estimated percentage** of 3-5 year old children in your center have wheezing or whistling in their chest?

---

3. To your knowledge, what **estimated percentage** of staff in your center have asthma?

---

4. Does your center have policies and guidelines for managing asthma medications?

- ☐ Yes
- ☐ No
- ☐ Not sure

5. Does your center have policies and guidelines for reducing asthma allergens and irritants?

- ☐ Yes
- ☐ No
- ☐ Not sure

6. Have you ever received any training on any of the following aspects of asthma (*select all that apply*)?

- ☐ No, I've never received any type of asthma training
- ☐ Asthma basics (causes of asthma, signs of asthma flare-ups)
- ☐ Reducing asthma allergens and irritants
- ☐ Asthma medication use and types
- ☐ Asthma management plans
- ☐ Proper administration of asthma medications

7. Does anyone who works at your center smoke or vape on your center's property?

- ☐ Yes, but OUTSIDE only
- ☐ Yes, both INSIDE and OUTSIDE
- ☐ No

8. How confident are you in your center's ability to care for children with asthma?

- ☐ Not at all confident
- ☐ Slightly confident
- ☐ Somewhat confident
- ☐ Very confident
- ☐ Extremely confident

9. In the past 12 months, did you keep any pets such as cats, dogs, gerbils, or birds at your center?

- ☐ Yes
- ☐ No

10. Does your center have wall-to-wall carpet?

- ☐ Yes
- ☐ No

11. Which of the following, if any, are a concern to you at or around your center (*select all that apply*)?

- ☐ None – I do not have any concerns
- ☐ Indoor or outdoor air quality
- ☐ Lead
- ☐ Water quality
- ☐ Radon
- ☐ Crime
- ☐ Asthma and/or allergies
- ☐ Noise/noise pollution
- ☐ Housing quality
- ☐ Natural disasters
- ☐ Toxins in pesticides and/or cleaners
- ☐ Other issues (*please specify*):

\_\_\_\_\_

#### CLASSROOM HEALTH PRACTICES: NUTRITION

*Please read each statement or question carefully and check the response that best fits your child care facility. Refer to the instructions at the beginning of this survey for clarification on how to complete survey items.*

*As a reminder, these questions ask about health practices in your preschool-age classroom(s) (**3-5 year old**) or Head Start program, **NOT** infant classroom or your Early Head Start program (if you have one). Please answer questions about your preschool classroom **with children ages 3-5 years**.*

#### *Fruits and Vegetables Served*

- |                                                                                                 |                                                 |                                          |                                          |                                               |
|-------------------------------------------------------------------------------------------------|-------------------------------------------------|------------------------------------------|------------------------------------------|-----------------------------------------------|
| 1. Fruit (not juice) is offered:                                                                | <input type="radio"/> 3 times per week or less  | <input type="radio"/> 4 times per week   | <input type="radio"/> 1 time per day     | <input type="radio"/> 2 or more times per day |
| 2. Fruit is offered canned <b>in own juice</b> (no syrups), fresh, or frozen:                   | <input type="radio"/> Rarely or never           | <input type="radio"/> Some of the time   | <input type="radio"/> Most of the time   | <input type="radio"/> All of the time         |
| 3. Vegetables (not including French fries, tater tots, hash browns or dried beans) are offered: | <input type="radio"/> 2 times per week or less  | <input type="radio"/> 3-4 times per week | <input type="radio"/> 1 time per day     | <input type="radio"/> 2 or more times per day |
| 4. Vegetables, other than potatoes, corn, and green beans are offered:                          | <input type="radio"/> Less than 1 time per week | <input type="radio"/> 1-2 times per week | <input type="radio"/> 3-4 times per week | <input type="radio"/> 1 or more times per day |
| 5. Cooked vegetables are prepared with added meat fat, margarine or butter:                     | <input type="radio"/> All of the time           | <input type="radio"/> Most of the time   | <input type="radio"/> Some of the time   | <input type="radio"/> Rarely or never         |

### Meats, Fats, and Grains

|                                                                                                         |                                                 |                                          |                                          |                                                      |
|---------------------------------------------------------------------------------------------------------|-------------------------------------------------|------------------------------------------|------------------------------------------|------------------------------------------------------|
| 6. Fried or pre-fried potatoes (French fries, tater tots, hash browns) are offered:                     | <input type="radio"/> 3 or more times per week  | <input type="radio"/> 2 times per week   | <input type="radio"/> 1 time per week    | <input type="radio"/> Less than once a week or never |
| 7. Fried or pre-fried (frozen and breaded) meats or fish (chicken nuggets, fish sticks) are offered:    | <input type="radio"/> 3 or more times per week  | <input type="radio"/> 2 times per week   | <input type="radio"/> 1 time per week    | <input type="radio"/> Less than once a week or never |
| 8. High fat meats (sausage, bacon, hot dogs, bologna, ground beef) are offered:                         | <input type="radio"/> 3 or more times per week  | <input type="radio"/> 2 times per week   | <input type="radio"/> 1 time per week    | <input type="radio"/> Less than once a week or never |
| 9. Beans or lean meats (baked or broiled chicken, turkey, or fish) are offered:                         | <input type="radio"/> Less than 1 time per week | <input type="radio"/> 1-2 times per week | <input type="radio"/> 3-4 times per week | <input type="radio"/> 1 or more times per day        |
| 10. High fiber, whole grain foods (whole wheat bread, oatmeal, brown rice, Cheerios, etc.) are offered: | <input type="radio"/> 1 time per week or less   | <input type="radio"/> 2-4 times per week | <input type="radio"/> 1 time per day     | <input type="radio"/> 2 or more times per day        |
| 11. Sweets or salty foods (cookies, cakes, muffins, chips, etc.) are offered:                           | <input type="radio"/> 1 or more times per day   | <input type="radio"/> 3-4 times per week | <input type="radio"/> 1-2 times per week | <input type="radio"/> Less than once a week or never |

### Beverages

|                                                                                                          |                                                        |                                                                            |                                                               |                                                                   |
|----------------------------------------------------------------------------------------------------------|--------------------------------------------------------|----------------------------------------------------------------------------|---------------------------------------------------------------|-------------------------------------------------------------------|
| 12. Drinking water outside is:                                                                           | <input type="radio"/> Not visible                      | <input type="radio"/> Visible and available during designated water breaks | <input type="radio"/> Easily visible and available on request | <input type="radio"/> Easily visible and available for self-serve |
| 13. Drinking water inside is:                                                                            | <input type="radio"/> Not visible                      | <input type="radio"/> Visible and available during designated water breaks | <input type="radio"/> Easily visible and available on request | <input type="radio"/> Easily visible and available for self-serve |
| 14. <u>100%</u> fruit juice is offered:                                                                  | <input type="radio"/> 2 or more times per day          | <input type="radio"/> 1 time per day                                       | <input type="radio"/> 3-4 times per week                      | <input type="radio"/> 2 times per week or less                    |
| 15. Sugary drinks (Kool-Aid, sports drinks, sweet tea, punches, soda) other than 100% juice are offered: | <input type="radio"/> 1 or more times per week         | <input type="radio"/> Less than 1 time per week                            | <input type="radio"/> Less than 1 time per month              | <input type="radio"/> Rarely or never                             |
| 16. Milk served to children ages 3 years and older is usually:                                           | <input type="radio"/> Whole or regular                 | <input type="radio"/> 2% reduced fat                                       | <input type="radio"/> 1% low fat                              | <input type="radio"/> Skim or non-fat                             |
| 17. Soda and other vending machines are located:                                                         | <input type="radio"/> In entrance or front of building | <input type="radio"/> In public areas, but not entrance                    | <input type="radio"/> Out of sight of parents and children    | <input type="radio"/> No vending machines on site                 |

### Menus and Variety

|                     |                                    |                                    |                                                                    |                                                                 |
|---------------------|------------------------------------|------------------------------------|--------------------------------------------------------------------|-----------------------------------------------------------------|
| 18. Menus used are: | <input type="radio"/> 1-week cycle | <input type="radio"/> 2-week cycle | <input type="radio"/> 3-week cycle or more without seasonal change | <input type="radio"/> 3-week cycle or more with seasonal change |
|---------------------|------------------------------------|------------------------------------|--------------------------------------------------------------------|-----------------------------------------------------------------|

|                                                                        |                                       |                                        |                                        |                                       |
|------------------------------------------------------------------------|---------------------------------------|----------------------------------------|----------------------------------------|---------------------------------------|
| 19. Weekly menus include a combination of both new and familiar foods: | <input type="radio"/> Rarely or never | <input type="radio"/> Some of the time | <input type="radio"/> Most of the time | <input type="radio"/> All of the time |
| 20. Weekly menus include foods from a variety of cultures:             | <input type="radio"/> Rarely or never | <input type="radio"/> Some of the time | <input type="radio"/> Most of the time | <input type="radio"/> All of the time |

#### *Feeding Practices*

|                                                                                                                               |                                       |                                        |                                        |                                       |
|-------------------------------------------------------------------------------------------------------------------------------|---------------------------------------|----------------------------------------|----------------------------------------|---------------------------------------|
| 21. When children eat less than half of a meal or snack, the staff help determine if they are full before removing the plate: | <input type="radio"/> Rarely or never | <input type="radio"/> Some of the time | <input type="radio"/> Most of the time | <input type="radio"/> All of the time |
| 22. When children request seconds, staff help determine if they are still hungry before serving additional food:              | <input type="radio"/> Rarely or never | <input type="radio"/> Some of the time | <input type="radio"/> Most of the time | <input type="radio"/> All of the time |
| 23. Children are encouraged by staff to try a new or less favorite food:                                                      | <input type="radio"/> Rarely or never | <input type="radio"/> Some of the time | <input type="radio"/> Most of the time | <input type="radio"/> All of the time |
| 24. Food is used to encourage positive behavior:                                                                              | <input type="radio"/> All of the time | <input type="radio"/> Most of the time | <input type="radio"/> Some of the time | <input type="radio"/> Rarely or never |

#### *Foods Offered Outside of Regular Meals and Snacks*

|                                                                                                           |                                       |                                                                          |                                                                                             |                                                                                          |
|-----------------------------------------------------------------------------------------------------------|---------------------------------------|--------------------------------------------------------------------------|---------------------------------------------------------------------------------------------|------------------------------------------------------------------------------------------|
| 25. Guidelines provided to parents for food brought in for holidays or celebrations are:                  | <input type="radio"/> Not available   | <input type="radio"/> Loose guidelines with healthier options encouraged | <input type="radio"/> Written guidelines for healthier options that are not always enforced | <input type="radio"/> Written guidelines for healthier options that are usually enforced |
| 26. Holidays are celebrated with mostly healthy foods or with non-food treats like stickers:              | <input type="radio"/> Rarely or never | <input type="radio"/> Some of the time                                   | <input type="radio"/> Most of the time                                                      | <input type="radio"/> All of the time                                                    |
| 27. Fundraising consists of selling only non-food items (like wrapping paper, coupon books or magazines): | <input type="radio"/> Rarely or never | <input type="radio"/> Some of the time                                   | <input type="radio"/> Most of the time                                                      | <input type="radio"/> All of the time                                                    |

#### *Supporting Healthy Eating*

|                                                                                                             |                                       |                                        |                                        |                                       |
|-------------------------------------------------------------------------------------------------------------|---------------------------------------|----------------------------------------|----------------------------------------|---------------------------------------|
| 28. Staff join children at the table for meals:                                                             | <input type="radio"/> Rarely or never | <input type="radio"/> Some of the time | <input type="radio"/> Most of the time | <input type="radio"/> All of the time |
| 29. Meals are served family style (children serve themselves with limited help):                            | <input type="radio"/> Rarely or never | <input type="radio"/> Some of the time | <input type="radio"/> Most of the time | <input type="radio"/> All of the time |
| 30. Staff consume the same food and drinks as the children:                                                 | <input type="radio"/> Rarely or never | <input type="radio"/> Some of the time | <input type="radio"/> Most of the time | <input type="radio"/> All of the time |
| 31. Staff eat or drink less healthy foods (especially sweets, soda and fast food) in front of the children: | <input type="radio"/> All of the time | <input type="radio"/> Most of the time | <input type="radio"/> Some of the time | <input type="radio"/> Rarely or never |

|                                                                                                        |                                                                                   |                                                                                                     |                                                                                              |                                                                                              |
|--------------------------------------------------------------------------------------------------------|-----------------------------------------------------------------------------------|-----------------------------------------------------------------------------------------------------|----------------------------------------------------------------------------------------------|----------------------------------------------------------------------------------------------|
| 32. Staff talk informally with children about trying and enjoying healthy foods:                       | <input type="radio"/> Rarely or never                                             | <input type="radio"/> Some of the time                                                              | <input type="radio"/> Most of the time                                                       | <input type="radio"/> All of the time                                                        |
| 33. Support for good nutrition is visibly displayed in 3 to 5 year old classrooms and common areas by: | <input type="radio"/> No posters, pictures, or books about healthy food displayed | <input type="radio"/> A few posters, pictures, or books about healthy food displayed in a few rooms | <input type="radio"/> Posters, pictures, or books about healthy food displayed in most rooms | <input type="radio"/> Posters, pictures, or books about healthy food displayed in every room |

#### Nutrition Education for Staff, Children, and Parents

|                                                                                                                      |                                       |                                                 |                                           |                                                |
|----------------------------------------------------------------------------------------------------------------------|---------------------------------------|-------------------------------------------------|-------------------------------------------|------------------------------------------------|
| 34. Training opportunities on nutrition (other than food safety and food program guidelines) are provided for staff: | <input type="radio"/> Rarely or never | <input type="radio"/> Less than 1 time per year | <input type="radio"/> 1 time per year     | <input type="radio"/> 2 times per year or more |
| 35. Nutrition education is provided for children through a standardized curriculum:                                  | <input type="radio"/> Rarely or never | <input type="radio"/> 1 time per month          | <input type="radio"/> 2-3 times per month | <input type="radio"/> 1 time per week or more  |
| 36. Nutrition education opportunities are offered to parents (workshops, activities and take-home materials):        | <input type="radio"/> Rarely or never | <input type="radio"/> Less than 1 time per year | <input type="radio"/> 1 time per year     | <input type="radio"/> 2 times per year or more |

#### Nutrition Policy

|                                                                                          |                                      |                                                                         |                                                           |                                                          |
|------------------------------------------------------------------------------------------|--------------------------------------|-------------------------------------------------------------------------|-----------------------------------------------------------|----------------------------------------------------------|
| 37. A written policy on nutrition and food service that covers most of the above topics: | <input type="radio"/> Does not exist | <input type="radio"/> Exists informally, but is not written or followed | <input type="radio"/> Is written, but not always followed | <input type="radio"/> Is written, available and followed |
|------------------------------------------------------------------------------------------|--------------------------------------|-------------------------------------------------------------------------|-----------------------------------------------------------|----------------------------------------------------------|

#### BARRIERS TO CLASSROOM HEALTH PRACTICES: NUTRITION

The list below includes possible barriers which some ECE centers and teachers feel makes it harder to **serve healthier meals and snacks**, such as those suggested by the Child and Adult Care Food Program (CACFP) best practices. Examples of those best practices include the following:

- Include fruits and vegetables as snacks
- Serve no juice
- Include vegetable subgroups throughout the week
- Serve meals family style
- Serve 2 servings of whole grain food per day

There are no right or wrong answers. For each statement, please respond "YES" if you feel this is a barrier which your center faces or not, specific to **serving healthier meals and snacks for 3-5 year old children**.

|                                                                                                 | YES                   | NO                    |
|-------------------------------------------------------------------------------------------------|-----------------------|-----------------------|
| 1. Not enough money to cover the cost of serving healthier meals and snacks                     | <input type="radio"/> | <input type="radio"/> |
| 2. Lack of control over the types of meals and snacks that are delivered to us                  | <input type="radio"/> | <input type="radio"/> |
| 3. Those preparing meals and snacks lack the knowledge to prepare healthier foods and beverages | <input type="radio"/> | <input type="radio"/> |
| 4. Those preparing meals and snacks lack the time to prepare healthier foods and beverages      | <input type="radio"/> | <input type="radio"/> |

|                                                                                                               | YES                   | NO                    |
|---------------------------------------------------------------------------------------------------------------|-----------------------|-----------------------|
| 5. Children would not like the taste of healthier meals and snacks                                            | <input type="radio"/> | <input type="radio"/> |
| 6. Directors/providers are concerned about wasting food because children won't eat healthier meals and snacks | <input type="radio"/> | <input type="radio"/> |
| 7. Parents/guardians do not want children to be served healthier foods                                        | <input type="radio"/> | <input type="radio"/> |
| 8. Parents/guardians provide unhealthy snacks and meals                                                       | <input type="radio"/> | <input type="radio"/> |
| 9. Limited space for food storage, such as refrigerator and cabinet space                                     | <input type="radio"/> | <input type="radio"/> |
| 10. Lack of availability of healthy foods in my area                                                          | <input type="radio"/> | <input type="radio"/> |
| 11. Lack of support from other providers                                                                      | <input type="radio"/> | <input type="radio"/> |
| 12. Other areas in our program have higher priority than nutrition at this time                               | <input type="radio"/> | <input type="radio"/> |
| 13. So many different recommendations that providers do not know which to follow                              | <input type="radio"/> | <input type="radio"/> |
| 14. Unsure which foods can be reimbursed through CACFP                                                        | <input type="radio"/> | <input type="radio"/> |
| 15. Weekly schedule limits time to shop more than once per week                                               | <input type="radio"/> | <input type="radio"/> |
| 16. Please describe any other barriers not listed above:                                                      |                       |                       |

---

*The list below includes possible barriers which some ECE centers and teachers feel makes it harder to **use healthful mealtime practices**, such as those suggested by the Child and Adult Care Food Program (CACFP) best practices.*

*Examples of those best practices include the following:*

- *Praising children for trying new foods*
- *Talking with children about healthy foods*
- *Allowing children to decide when they are full*
- *Sitting with children during mealtime and eating the same foods*
- *Serving meals family style*

*There are no right or wrong answers. For each statement, please respond "YES" if you feel this is a barrier which your center faces or not, specific to **using healthful mealtime practices for 3-5 year old children**.*

|                                                                                                                                                                          | YES                   | NO                    |
|--------------------------------------------------------------------------------------------------------------------------------------------------------------------------|-----------------------|-----------------------|
| 1. Providers do not have time to sit with children during meals                                                                                                          | <input type="radio"/> | <input type="radio"/> |
| 2. There are not enough providers in the program to sit with children during meals                                                                                       | <input type="radio"/> | <input type="radio"/> |
| 3. There is not enough money to cover the cost of serving meals and snacks to providers                                                                                  | <input type="radio"/> | <input type="radio"/> |
| 4. Providers are unsure how to encourage children's healthy eating                                                                                                       | <input type="radio"/> | <input type="radio"/> |
| 5. Providers do not like the taste of the healthy foods that are served at the childcare program, so they have trouble encouraging children's healthy eating at mealtime | <input type="radio"/> | <input type="radio"/> |
| 6. Providers have dietary restrictions, so they find it difficult to eat the same foods that are served to children                                                      | <input type="radio"/> | <input type="radio"/> |
| 7. Providers are uncertain how to handle children who are hesitant to try new foods                                                                                      | <input type="radio"/> | <input type="radio"/> |
| 8. Providers feel mealtimes with children are stressful/chaotic                                                                                                          | <input type="radio"/> | <input type="radio"/> |
| 9. If you let children serve themselves, they would <b>not eat/drink enough</b>                                                                                          | <input type="radio"/> | <input type="radio"/> |
| 10. If you let children serve themselves, they would <b>eat/drink too much</b>                                                                                           | <input type="radio"/> | <input type="radio"/> |
| 11. If you let children serve themselves, they will make too much of a mess                                                                                              | <input type="radio"/> | <input type="radio"/> |
| 12. Please describe any other barriers not listed above:                                                                                                                 |                       |                       |

---

### CLASSROOM HEALTH PRACTICES: PHYSICAL ACTIVITY

*Please read each statement or question carefully and check the response that best fits your child care facility. Refer to the instructions at the beginning of this survey for clarification on how to complete survey items.*

*As a reminder, these questions ask about health practices in your preschool-age classroom(s) (**3-5 year old**) or Head Start program, NOT infant classroom or your Early Head Start program (if you have one). Please answer questions about your preschool classroom **with children ages 3-5 years**.*

| <i>Active Play and Inactive Time</i>                                              |                       |                                           |                       |                                     |                       |                                           |                       |                                                              |
|-----------------------------------------------------------------------------------|-----------------------|-------------------------------------------|-----------------------|-------------------------------------|-----------------------|-------------------------------------------|-----------------------|--------------------------------------------------------------|
| 1. Active play time is provided to all children:                                  | <input type="radio"/> | 45 minutes or less each day               | <input type="radio"/> | 46-90 minutes each day              | <input type="radio"/> | 91-120 minutes each day                   | <input type="radio"/> | More than 120 minutes each day                               |
| 2. Teacher-led physical activity is provided to all children:                     | <input type="radio"/> | 1 time per week or less                   | <input type="radio"/> | 2-4 times per week                  | <input type="radio"/> | 1 time per day                            | <input type="radio"/> | 2 or more times per day                                      |
| 3. Outdoor active play is provided for all children:                              | <input type="radio"/> | 1 time per week or less                   | <input type="radio"/> | 2-4 times per week                  | <input type="radio"/> | 1 time per day                            | <input type="radio"/> | 2 or more times per day                                      |
| 4. Active play time is withheld for children who misbehave:                       | <input type="radio"/> | Often                                     | <input type="radio"/> | Sometimes                           | <input type="radio"/> | Never                                     | <input type="radio"/> | Never and we provide more active play time for good behavior |
| 5. Children are seated (excluding naps and meals) more than 30 minutes at a time: | <input type="radio"/> | 1 or more times per day                   | <input type="radio"/> | 3-4 times per week                  | <input type="radio"/> | 1-2 times per week                        | <input type="radio"/> | Less than once a week or never                               |
| 6. Television and video use consists of the:                                      | <input type="radio"/> | TV turned on for 5 or more hours per week | <input type="radio"/> | TV turned on for 3-4 hours per week | <input type="radio"/> | TV turned on for 2 hours per week or less | <input type="radio"/> | TV used rarely or never                                      |

| <i>Play Environment</i>                                                                          |                       |                                                        |                       |                                                                 |                       |                                                              |                       |                                                                            |
|--------------------------------------------------------------------------------------------------|-----------------------|--------------------------------------------------------|-----------------------|-----------------------------------------------------------------|-----------------------|--------------------------------------------------------------|-----------------------|----------------------------------------------------------------------------|
| 7. Fixed play equipment (tunnels) balancing equipment, climbing equipment, overhead ladders) is: | <input type="radio"/> | Unavailable at our site                                | <input type="radio"/> | Only one type of equipment is available                         | <input type="radio"/> | Different equipment available that suits most children       | <input type="radio"/> | Wide variety of equipment available and accommodates needs of all children |
| 8. Portable play equipment (wheel toys, balls, hoops, ribbons) consists of:                      | <input type="radio"/> | Little variety and children must take turns            | <input type="radio"/> | Some variety but children must take turns                       | <input type="radio"/> | Good variety but children must take turns                    | <input type="radio"/> | Lots of variety for children to use at same time                           |
| 9. Outdoor portable play equipment is:                                                           | <input type="radio"/> | Available during special times only                    | <input type="radio"/> | Located out of child sight and reach, staff must access         | <input type="radio"/> | Available on request                                         | <input type="radio"/> | Freely available by children at all times                                  |
| 10. Outdoor space includes:                                                                      | <input type="radio"/> | No open running spaces, no track/path for wheeled toys | <input type="radio"/> | Very limited open running space, no track/path for wheeled toys | <input type="radio"/> | Plenty of open running space, no track/path for wheeled toys | <input type="radio"/> | Plenty of open running spaces and a track/path for wheeled toys            |

|                                     |                                           |                                                                       |                                                                            |                                                             |
|-------------------------------------|-------------------------------------------|-----------------------------------------------------------------------|----------------------------------------------------------------------------|-------------------------------------------------------------|
| 11. Indoor play space is available: | <input type="radio"/> For quiet play only | <input type="radio"/> For very limited movement (jumping and rolling) | <input type="radio"/> For some active play (jumping, rolling and skipping) | <input type="radio"/> For all activities, including running |
|-------------------------------------|-------------------------------------------|-----------------------------------------------------------------------|----------------------------------------------------------------------------|-------------------------------------------------------------|

| <i>Supporting Physical Activity</i>                                                                       |                                                                                        |                                                                                                          |                                                                                                       |                                                                                                       |
|-----------------------------------------------------------------------------------------------------------|----------------------------------------------------------------------------------------|----------------------------------------------------------------------------------------------------------|-------------------------------------------------------------------------------------------------------|-------------------------------------------------------------------------------------------------------|
| 12. During active play time staff:                                                                        | <input type="radio"/> Supervise play only (mostly sit or stand)                        | <input type="radio"/> Sometimes encourage children to be active                                          | <input type="radio"/> Sometimes encourage children to be active and join children in active play      | <input type="radio"/> Often encourage children to be active and join children in active play          |
| 13. Support for physical activity is visibly displayed in 3 to 5 year old classrooms and common areas by: | <input type="radio"/> No posters, pictures, or books about physical activity displayed | <input type="radio"/> A few posters, pictures, or books about physical activity displayed in a few rooms | <input type="radio"/> Posters, pictures, or books about physical activity are displayed in most rooms | <input type="radio"/> Posters, pictures, or books about physical activity are displayed in every room |

| <i>Physical Activity Education for Staff, Children, and Parents</i>                                                   |                                       |                                                 |                                           |                                                |
|-----------------------------------------------------------------------------------------------------------------------|---------------------------------------|-------------------------------------------------|-------------------------------------------|------------------------------------------------|
| 14. Training opportunities are provided for staff in physical activity (not including playground safety):             | <input type="radio"/> Rarely or never | <input type="radio"/> Less than 1 time per year | <input type="radio"/> 1 time per year     | <input type="radio"/> 2 times per year or more |
| 15. Physical activity education (motor-skill development) is provided for children through a standardized curriculum: | <input type="radio"/> Rarely or never | <input type="radio"/> 1 time per month          | <input type="radio"/> 2-3 times per month | <input type="radio"/> 1 time per week or more  |
| 16. Physical activity education is offered to parents (workshops, activities and take-home materials):                | <input type="radio"/> Rarely or never | <input type="radio"/> Less than 1 time per year | <input type="radio"/> 1 time per year     | <input type="radio"/> 2 times per year or more |

| <i>Physical Activity Policy</i>                                                 |                                      |                                                                         |                                                           |                                                          |
|---------------------------------------------------------------------------------|--------------------------------------|-------------------------------------------------------------------------|-----------------------------------------------------------|----------------------------------------------------------|
| 17. A written policy on physical activity that covers most of the above topics: | <input type="radio"/> Does not exist | <input type="radio"/> Exists informally, but is not written or followed | <input type="radio"/> Is written, but not always followed | <input type="radio"/> Is written, available and followed |

### BARRIERS TO CLASSROOM HEALTH PRACTICES: PHYSICAL ACTIVITY

The list below includes possible barriers which some ECE centers and teachers feel makes it harder to **promote physical activity**. Examples of those practices include the following:

- Providing indoor and outdoor active playtime
- Talking with children about physical activity
- Providing teacher-led physical activity
- Providing indoor and outdoor play space and equipment
- Verbally and physically encouraging children to be physically active

There are no right or wrong answers. For each statement, please respond "YES" if you feel this is a barrier which your center faces or not, specific to **promoting physical activity for 3-5 year old children**.

|                                                                                                                     | YES                   | NO                    |
|---------------------------------------------------------------------------------------------------------------------|-----------------------|-----------------------|
| 1. There are competing curriculum priorities that take precedent over promoting physical activity                   | <input type="radio"/> | <input type="radio"/> |
| 2. Providers are unsure how to encourage children's participation in physical activity                              | <input type="radio"/> | <input type="radio"/> |
| 3. Limited space for storing activity-promoting toys and equipment                                                  | <input type="radio"/> | <input type="radio"/> |
| 4. Lack of resources to purchase activity-promoting toys and equipment                                              | <input type="radio"/> | <input type="radio"/> |
| 5. Limited room for indoor active playtime                                                                          | <input type="radio"/> | <input type="radio"/> |
| 6. Limited room for outdoor active playtime                                                                         | <input type="radio"/> | <input type="radio"/> |
| 7. Undesirable weather conditions that do not permit outdoor playtime                                               | <input type="radio"/> | <input type="radio"/> |
| 8. Students are reluctant to participate in physical activity                                                       | <input type="radio"/> | <input type="radio"/> |
| 9. The school board does not support the idea of promoting physical activity for children                           | <input type="radio"/> | <input type="radio"/> |
| 10. Parents/guardians do not support the idea of promoting physical activity for children                           | <input type="radio"/> | <input type="radio"/> |
| 11. Children often arrive to school wearing clothing that is inappropriate for outdoor play or improperly fitting   | <input type="radio"/> | <input type="radio"/> |
| 12. Providers are concerned children will injure themselves during active playtime                                  | <input type="radio"/> | <input type="radio"/> |
| 13. Providers are concerned about neighborhood safety during active playtime                                        | <input type="radio"/> | <input type="radio"/> |
| 14. Playground licensing requirements limit ability to provide equipment that allows for vigorous physical activity | <input type="radio"/> | <input type="radio"/> |
| 15. Providers prefer to remain indoors and/or partake in sedentary classroom activities over physical activities    | <input type="radio"/> | <input type="radio"/> |
| 16. Providers feel playtime with children is stressful/chaotic                                                      | <input type="radio"/> | <input type="radio"/> |
| 17. Please describe any other barriers not listed above:                                                            |                       |                       |

---

### CENTER CLEANERS AND AIR FRESHENERS

1. How often do you use bleach at your center?

- ☐ Never, we do not use bleach
- ☐ Daily or a few times a day
- ☐ Weekly or a few times a week
- ☐ Monthly or a few times a month
- ☐ Every few months or less often

2. Does your center use low toxicity or less toxic cleaners?

- ☐ Yes
- ☐ No
- ☐ Not sure

3. What kind of air fresheners are used at your center (*select all that apply*)?

- ☐ None – do not use any type of air freshener or candle
- ☐ Scented candles
- ☐ Spray air fresheners
- ☐ Continuous release (like a plug-in)
- ☐ Incense
- ☐ Essential oils (reed diffuser or other type of diffuser)
- ☐ Essential oil electric or battery diffuser
- ☐ Potpourri
- ☐ Gel canister
- ☐ Other types of air freshener(s) (*please specify*):  
\_\_\_\_\_

### CENTER PESTS AND PEST CONTROL

1. To your knowledge, what year was your center building originally built?

\_\_\_\_\_

2. Integrated Pest Management, often called “IPM” for short, is an approach to keeping pests (bugs, weeds, rats, etc.) below harmful levels and reducing or eliminating pesticide use. Have you heard of IPM?

- ☐ Yes
- ☐ No

3. Does your center use Integrated Pest Management (“IPM”) strategies for pest control?

- ☐ Yes
- ☐ No
- ☐ Not sure

4. Does your center have a written policy for use of pesticides (bug killers, weed killers, rat killers, etc.), stating when and how to apply them?

- ☐ Yes
- ☐ No
- ☐ Not sure
- ☐ Not applicable, **no** pesticides are used

5. Are staff notified before pesticides (including weed killers) are going to be applied **INSIDE or OUTSIDE** of your center?

- ☐ Yes
- ☐ No
- ☐ Not applicable, **no** pesticides are used

6. Are parents notified before pesticides (including weed killers) are going to be applied **INSIDE or OUTSIDE** of your center?

- ☐ Yes
- ☐ No
- ☐ Not applicable, **no** pesticides are used

THE FOLLOWING QUESTIONS ASK ABOUT PESTS AND PEST CONTROL METHODS **INSIDE** YOUR CENTER.

7. In the past 12 months, which of the following pests were a problem **INSIDE** your center (i.e., INDOORS) (select all that apply)?

- ☐ None- **did not** have any **INDOOR** pest problems.
- |                                      |                                                                |                                   |                                       |                                    |
|--------------------------------------|----------------------------------------------------------------|-----------------------------------|---------------------------------------|------------------------------------|
| <input type="checkbox"/> Ants        | <input type="checkbox"/> Fleas                                 | <input type="checkbox"/> Termites | <input type="checkbox"/> Snails/slugs | <input type="checkbox"/> Mold      |
| <input type="checkbox"/> Cockroaches | <input type="checkbox"/> Rodents                               | <input type="checkbox"/> Aphids   | <input type="checkbox"/> Spiders      | <input type="checkbox"/> Head lice |
| <input type="checkbox"/> Bed bugs    | <input type="checkbox"/> Other pest(s) (please specify): _____ |                                   |                                       |                                    |

8. In the past 12 months, which of the following pest control methods did your center use for controlling pests **INSIDE** your center (i.e., INDOORS) (select all that apply)?

- |                                                        |                                                 |                                                              |
|--------------------------------------------------------|-------------------------------------------------|--------------------------------------------------------------|
| <input type="checkbox"/> Nothing used                  | <input type="checkbox"/> Sprayed Pesticides     | <input type="checkbox"/> Bait stations or poison traps       |
| <input type="checkbox"/> Sticky fly strips             | <input type="checkbox"/> Mouse or rat traps     | <input type="checkbox"/> Moth balls                          |
| <input type="checkbox"/> Poison pellets or powders     | <input type="checkbox"/> Removed food sources   | <input type="checkbox"/> Fixed leaks                         |
| <input type="checkbox"/> Cleaned the area              | <input type="checkbox"/> Sealed cracks/openings | <input type="checkbox"/> Installed screens or other barriers |
| <input type="checkbox"/> Other (please specify): _____ |                                                 |                                                              |

9. In the past 12 months, who applied the **INDOOR** pesticides used at your center (select all that apply)?

- |                                         |                                                        |                                               |
|-----------------------------------------|--------------------------------------------------------|-----------------------------------------------|
| <input type="checkbox"/> Nothing used   | <input type="checkbox"/> Director                      | <input type="checkbox"/> Another staff member |
| <input type="checkbox"/> Myself         | <input type="checkbox"/> Custodial/janitorial staff    | <input type="checkbox"/> Pest control company |
| <input type="checkbox"/> Property owner | <input type="checkbox"/> Other (please specify): _____ |                                               |
| <input type="checkbox"/> Not sure       |                                                        |                                               |

10. In the past 12 months, how frequently were pesticides sprayed, scattered, or "bombed" **INSIDE** your center (i.e., INDOORS) (select all that apply)?

- |                                                                                                               |                                             |                                                          |
|---------------------------------------------------------------------------------------------------------------|---------------------------------------------|----------------------------------------------------------|
| <input type="checkbox"/> Nothing used                                                                         | <input type="checkbox"/> Once a week        | <input type="checkbox"/> Once a month                    |
| <input type="checkbox"/> Once a year                                                                          | <input type="checkbox"/> A few times a year | <input type="checkbox"/> Whenever pests become a problem |
| <input type="checkbox"/> Not applicable- pesticides were used, <b>but not</b> sprayed, scattered, or "bombed" |                                             |                                                          |

THE FOLLOWING QUESTIONS ASK ABOUT PESTS AND PEST CONTROL METHODS **OUTSIDE** YOUR CENTER.

11. In the past 12 months, which of the following pests were a problem **OUTSIDE** your center (i.e., OUTDOORS) (select all that apply)?

- ☐ None- **did not** have any **OUTDOOR** pest problems.
- |                                               |                                                                |                                   |                                       |                                    |
|-----------------------------------------------|----------------------------------------------------------------|-----------------------------------|---------------------------------------|------------------------------------|
| <input type="checkbox"/> Ants                 | <input type="checkbox"/> Fleas                                 | <input type="checkbox"/> Termites | <input type="checkbox"/> Snails/slugs | <input type="checkbox"/> Mold      |
| <input type="checkbox"/> Cockroaches          | <input type="checkbox"/> Rodents                               | <input type="checkbox"/> Aphids   | <input type="checkbox"/> Spiders      | <input type="checkbox"/> Scorpions |
| <input type="checkbox"/> Wasps/yellow jackets | <input type="checkbox"/> Other pest(s) (please specify): _____ |                                   |                                       |                                    |

12. In the past 12 months, which of the following pest control methods did your center use for controlling pests **OUTSIDE** your center (i.e., OUTDOORS) (*select all that apply*)?

- |                                                    |                                                                         |                                                              |
|----------------------------------------------------|-------------------------------------------------------------------------|--------------------------------------------------------------|
| <input type="checkbox"/> Nothing used              | <input type="checkbox"/> Sprayed Pesticides                             | <input type="checkbox"/> Bait stations or poison traps       |
| <input type="checkbox"/> Sticky fly strips         | <input type="checkbox"/> Mouse or rat traps                             | <input type="checkbox"/> Applied weed killer                 |
| <input type="checkbox"/> Poison pellets or powders | <input type="checkbox"/> Removed food sources                           | <input type="checkbox"/> Fixed leaks                         |
| <input type="checkbox"/> Cleaned the area          | <input type="checkbox"/> Sealed cracks/openings                         | <input type="checkbox"/> Installed screens or other barriers |
| <input type="checkbox"/> Cut grass or weeds        | <input type="checkbox"/> Other pest(s) ( <i>please specify</i> ): _____ |                                                              |

13. In the past 12 months, who applied the **OUTDOOR** pesticides used at your center (*select all that apply*)?

- |                                         |                                                                 |                                               |
|-----------------------------------------|-----------------------------------------------------------------|-----------------------------------------------|
| <input type="checkbox"/> Nothing used   | <input type="checkbox"/> Director                               | <input type="checkbox"/> Another staff member |
| <input type="checkbox"/> Myself         | <input type="checkbox"/> Custodial/janitorial staff             | <input type="checkbox"/> Pest control company |
| <input type="checkbox"/> Property owner | <input type="checkbox"/> Other ( <i>please specify</i> ): _____ |                                               |
| <input type="checkbox"/> Not sure       |                                                                 |                                               |

14. In the past 12 months, how frequently were pesticides sprayed, scattered, or “bombed” **OUTSIDE** your center (i.e., OUTDOORS) (*select all that apply*)?

- |                                                                                                               |                                             |                                                          |
|---------------------------------------------------------------------------------------------------------------|---------------------------------------------|----------------------------------------------------------|
| <input type="checkbox"/> Nothing used                                                                         | <input type="checkbox"/> Once a week        | <input type="checkbox"/> Once a month                    |
| <input type="checkbox"/> Once a year                                                                          | <input type="checkbox"/> A few times a year | <input type="checkbox"/> Whenever pests become a problem |
| <input type="checkbox"/> Not applicable- pesticides were used, <b>but not</b> sprayed, scattered, or “bombed” |                                             |                                                          |

Thank you! We greatly appreciate the time you have taken to complete this survey. For your convenience, **please use the postage-paid return envelope included in your survey packet to return your questionnaire.**

Finally, if you would like to be entered into a drawing for one of forty-five \$25 Amazon gift cards, **please include your name and email address below**; this information will **not** be connected with your survey responses, and will **only** be used to contact those who have been randomly selected to receive Amazon gift cards.

Name: \_\_\_\_\_

Email Address: \_\_\_\_\_

If you have any questions concerning the research study, please contact the Principal Investigator, Dr. Susan Sisson at susan-sisson@ouhsc.edu (405-271-2113 x 41176) or Study Coordinator, Bethany Williams at Bethany-Williams@ouhsc.edu (405-271-2113 x 41173).
